# Supplementary material
Source: PubMed Central journal article supplement (PMC3677132)

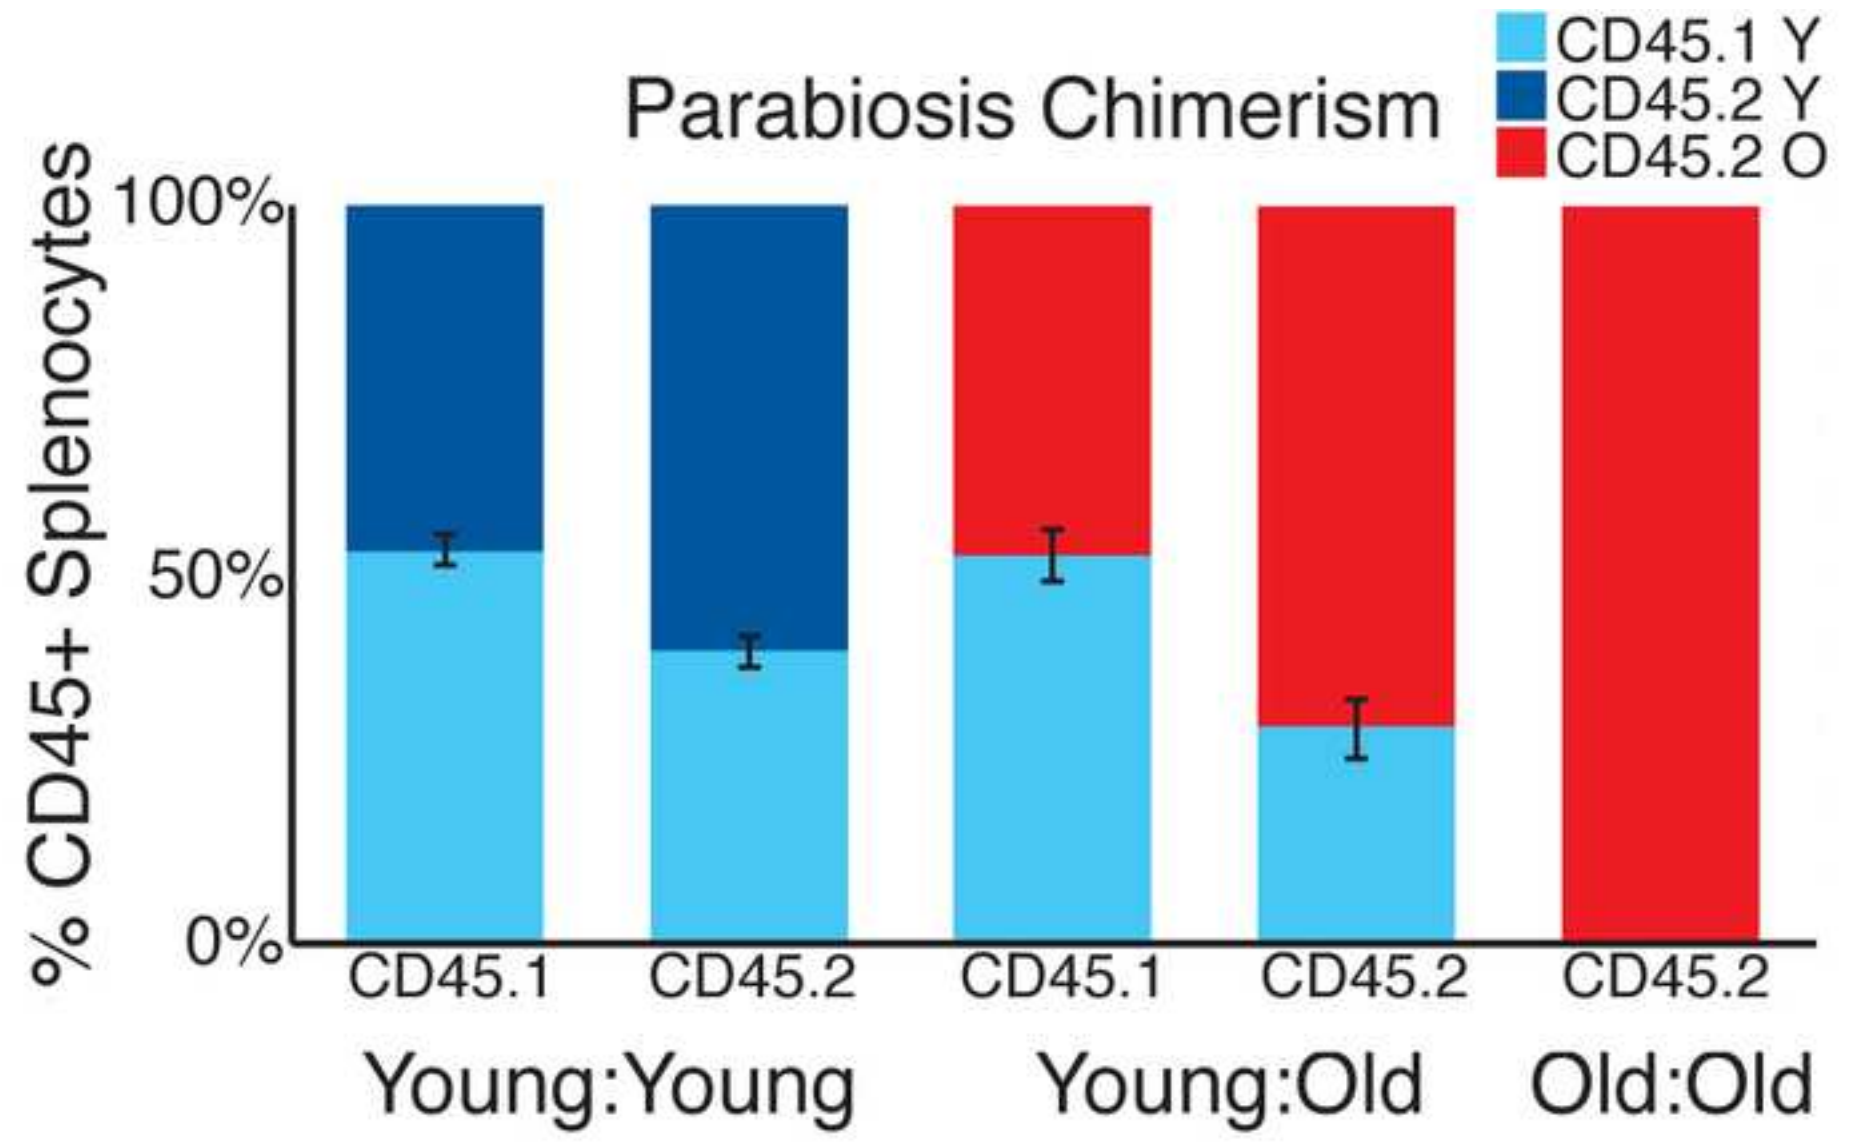

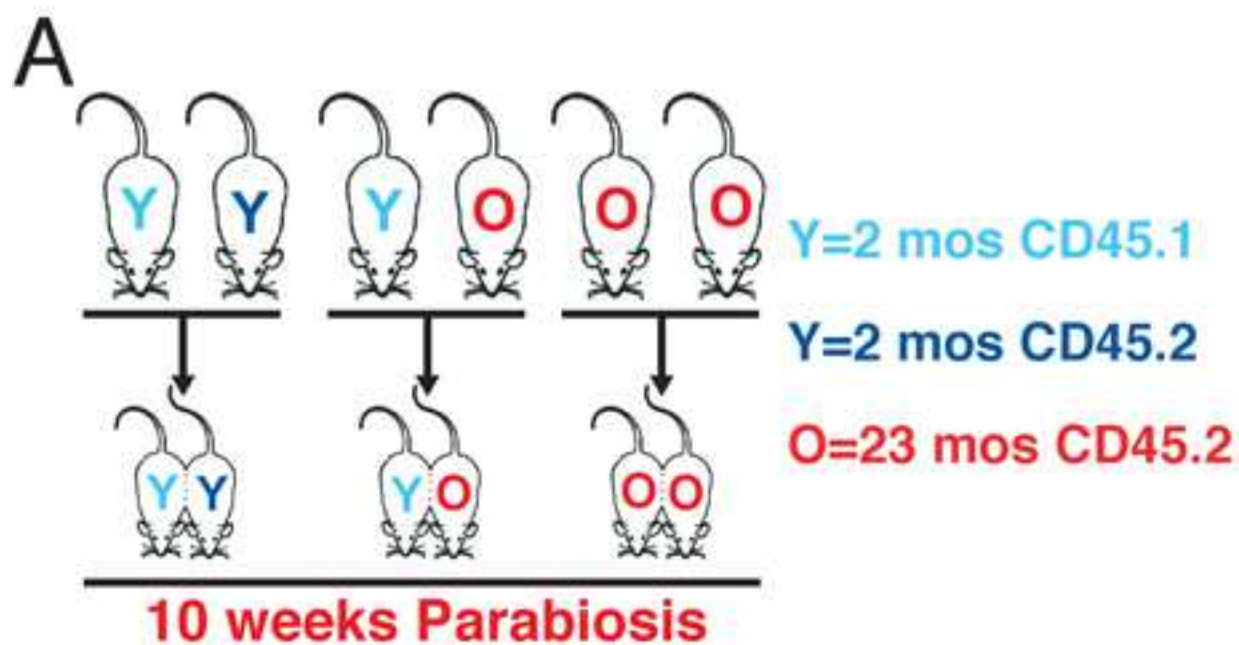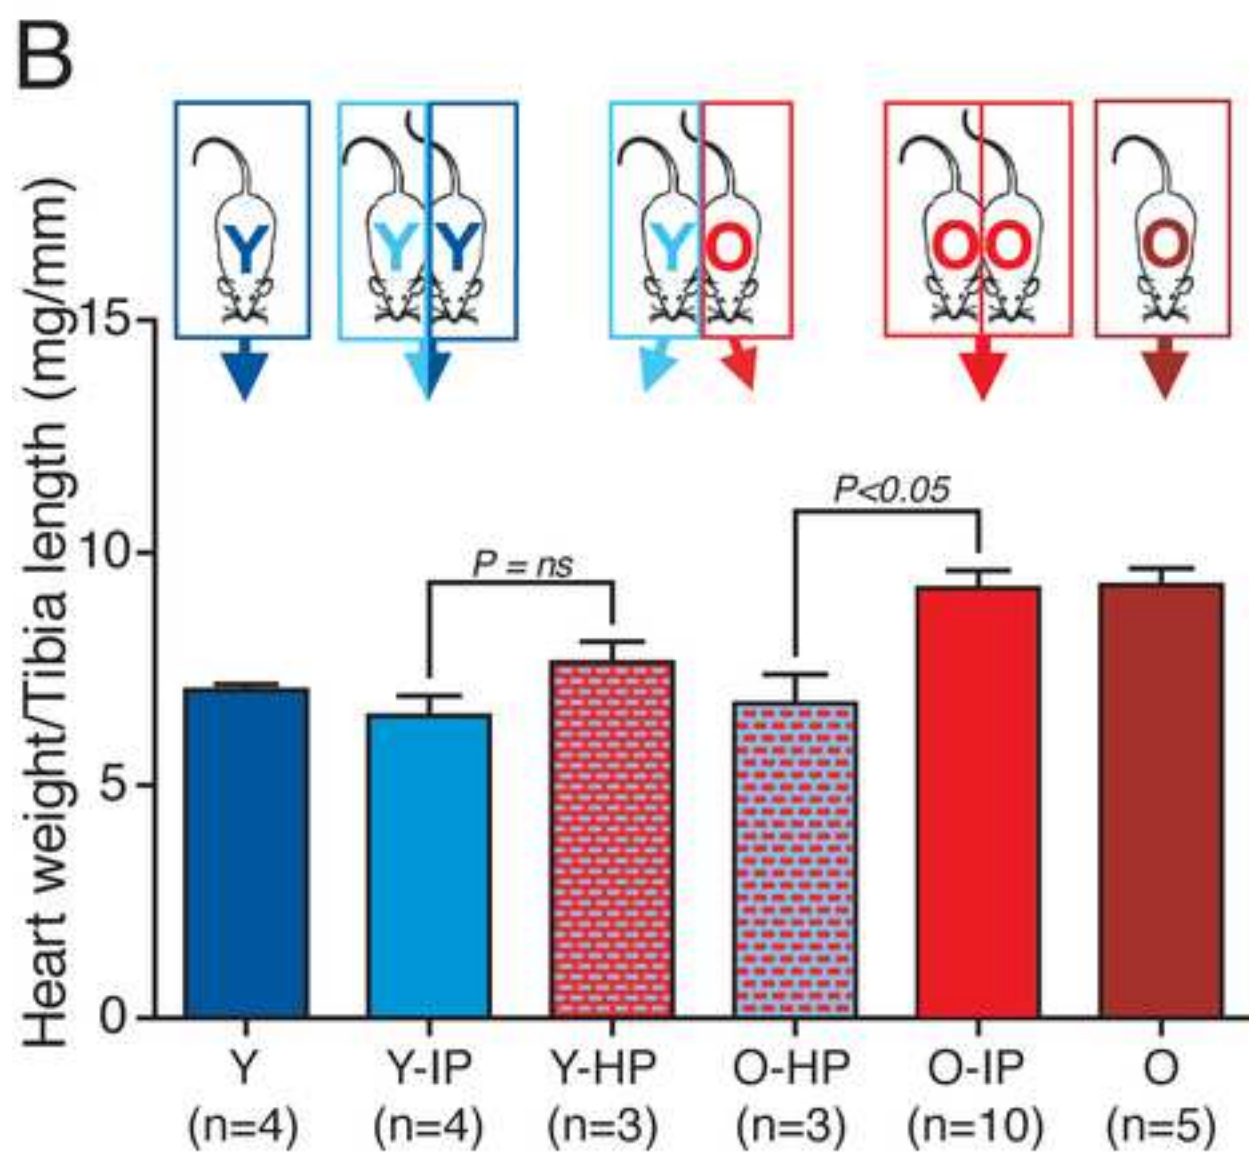

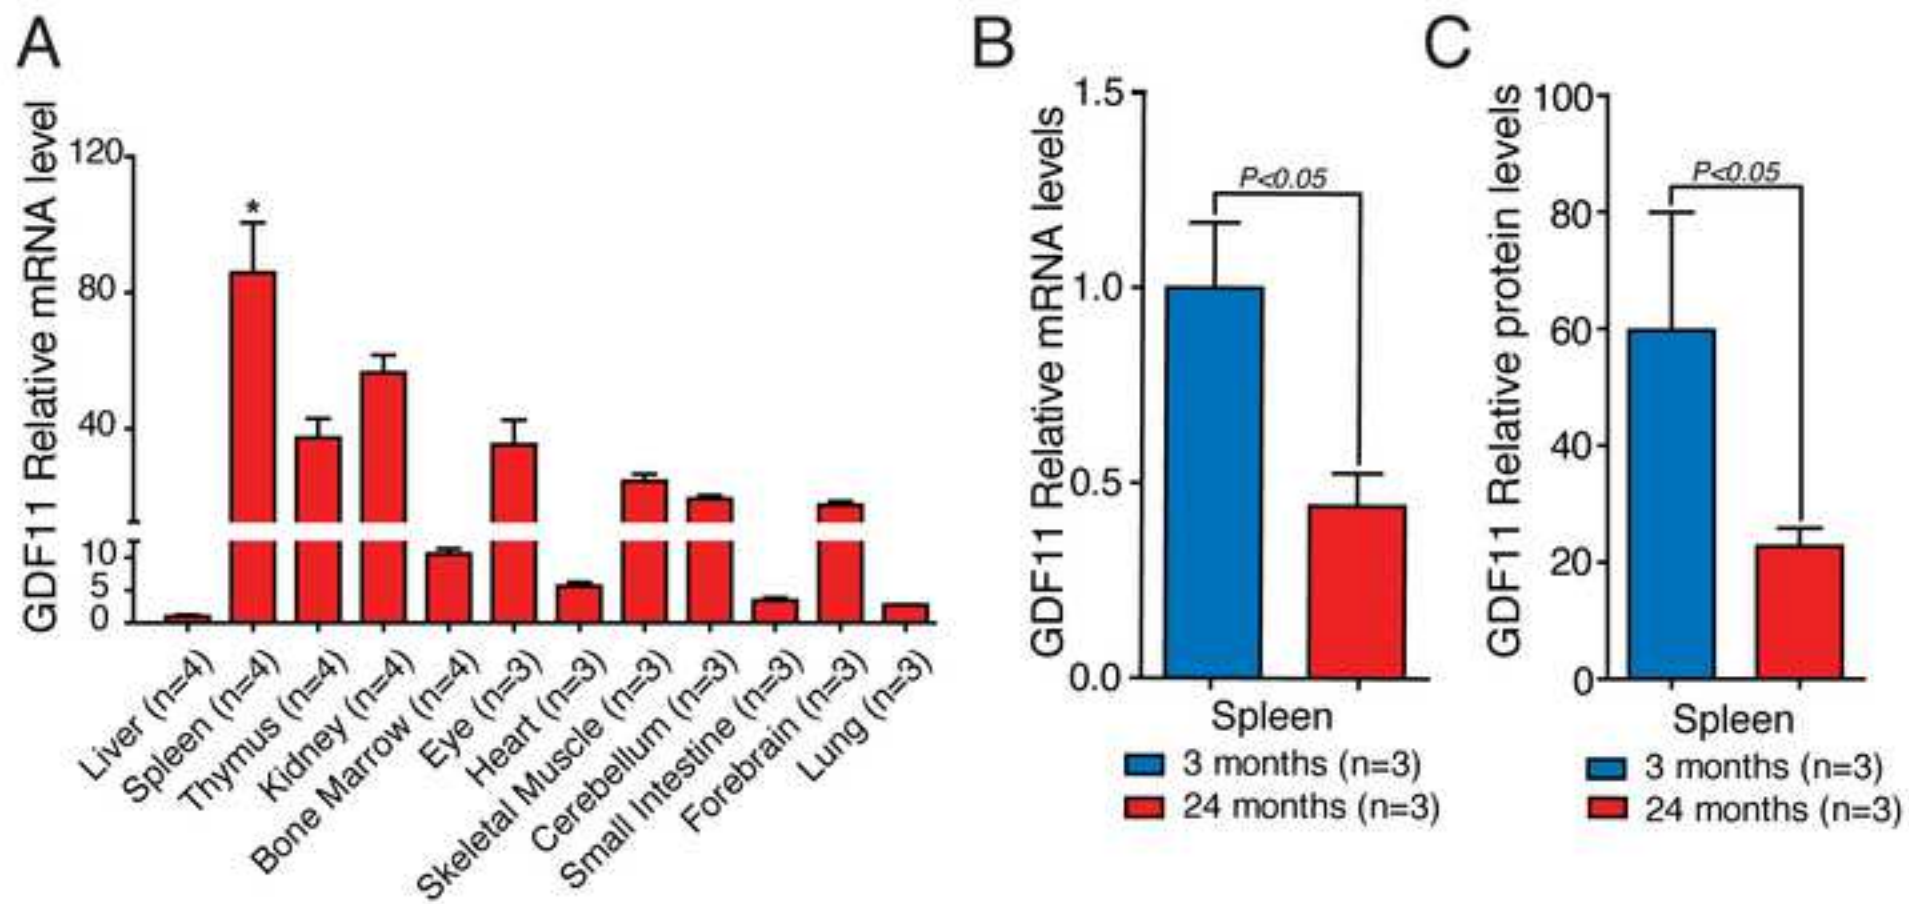

Supplemental Figure 4

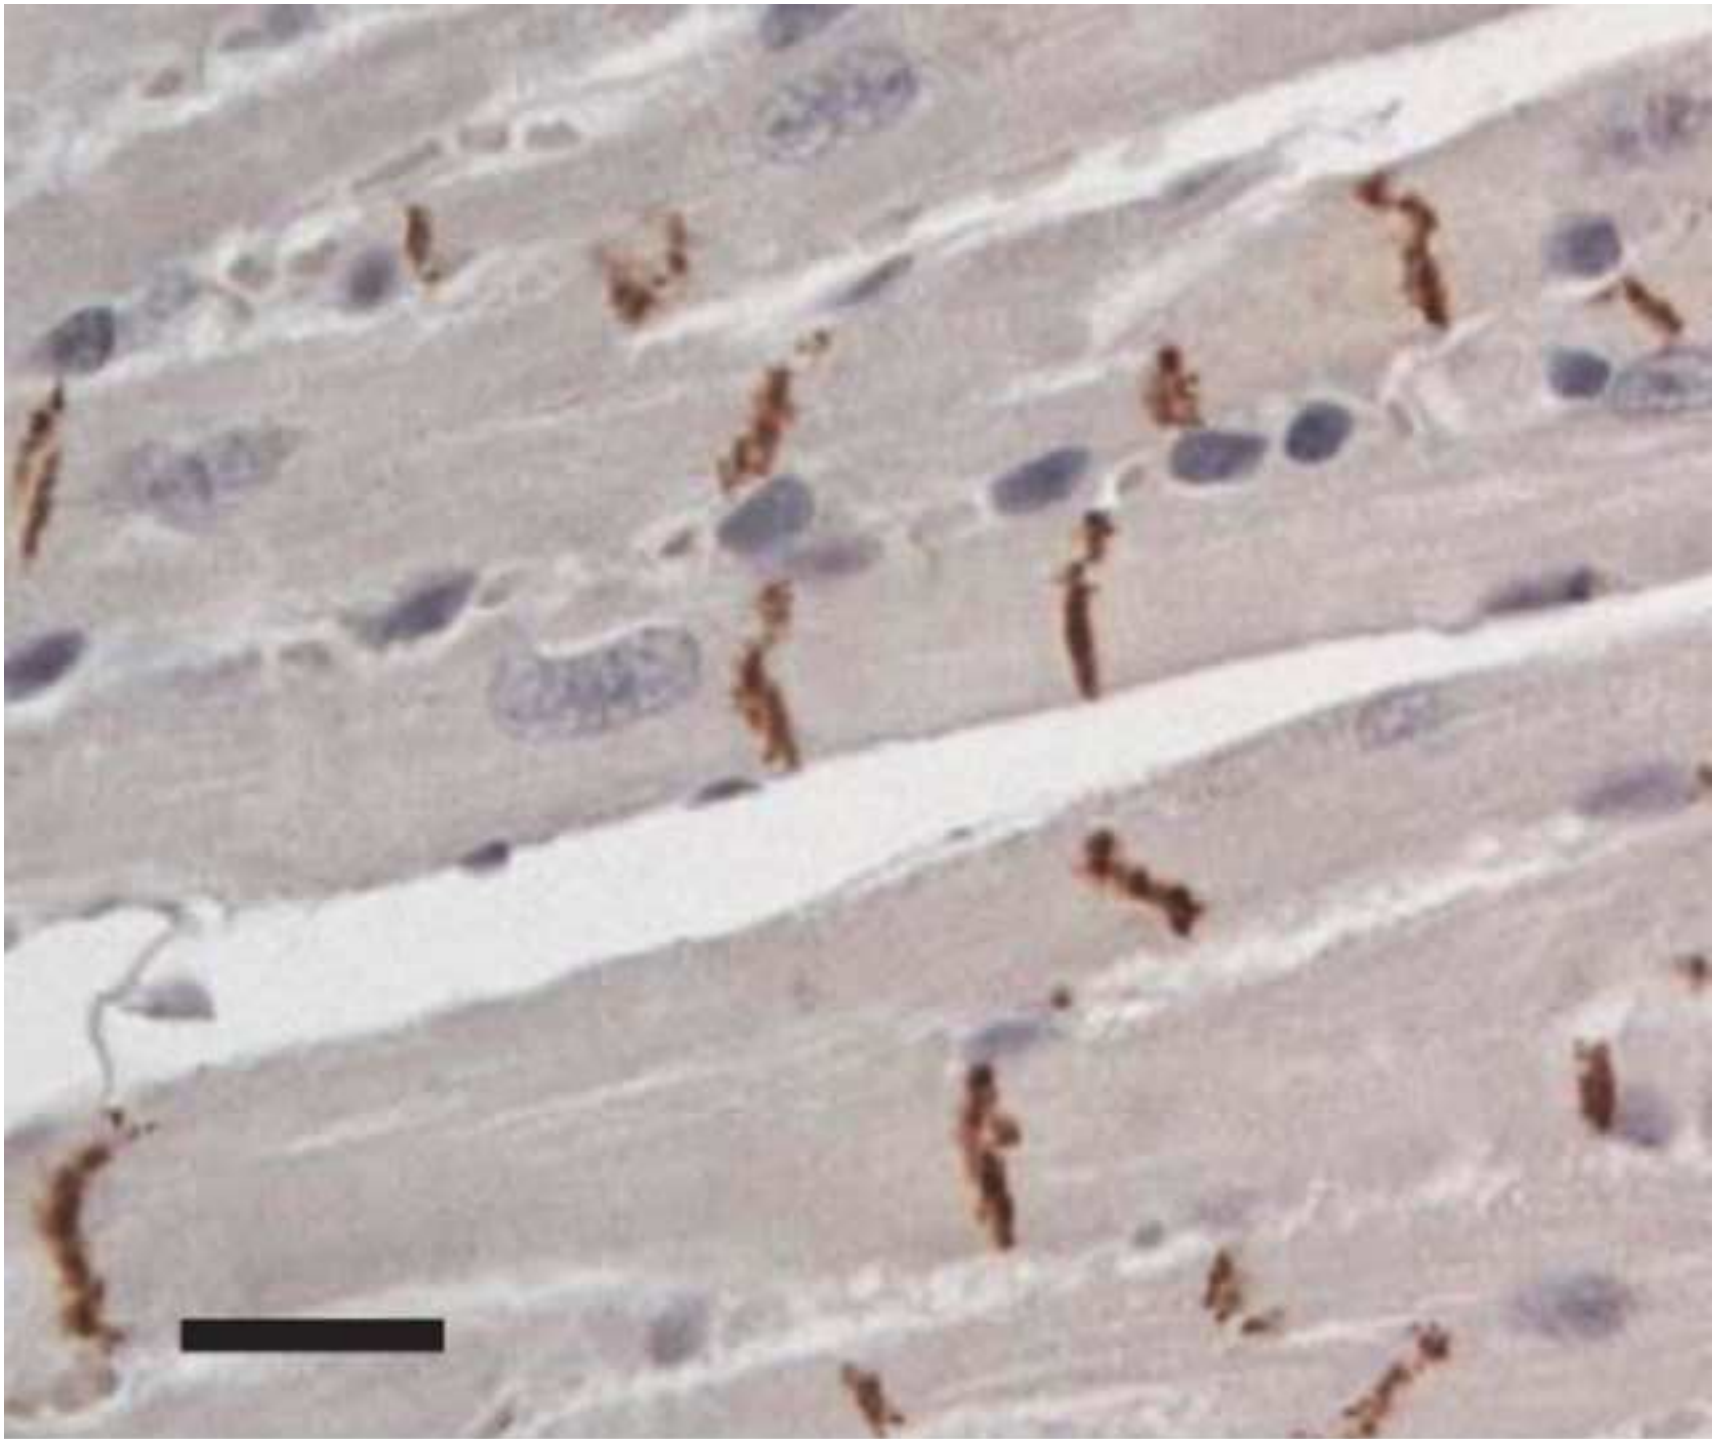

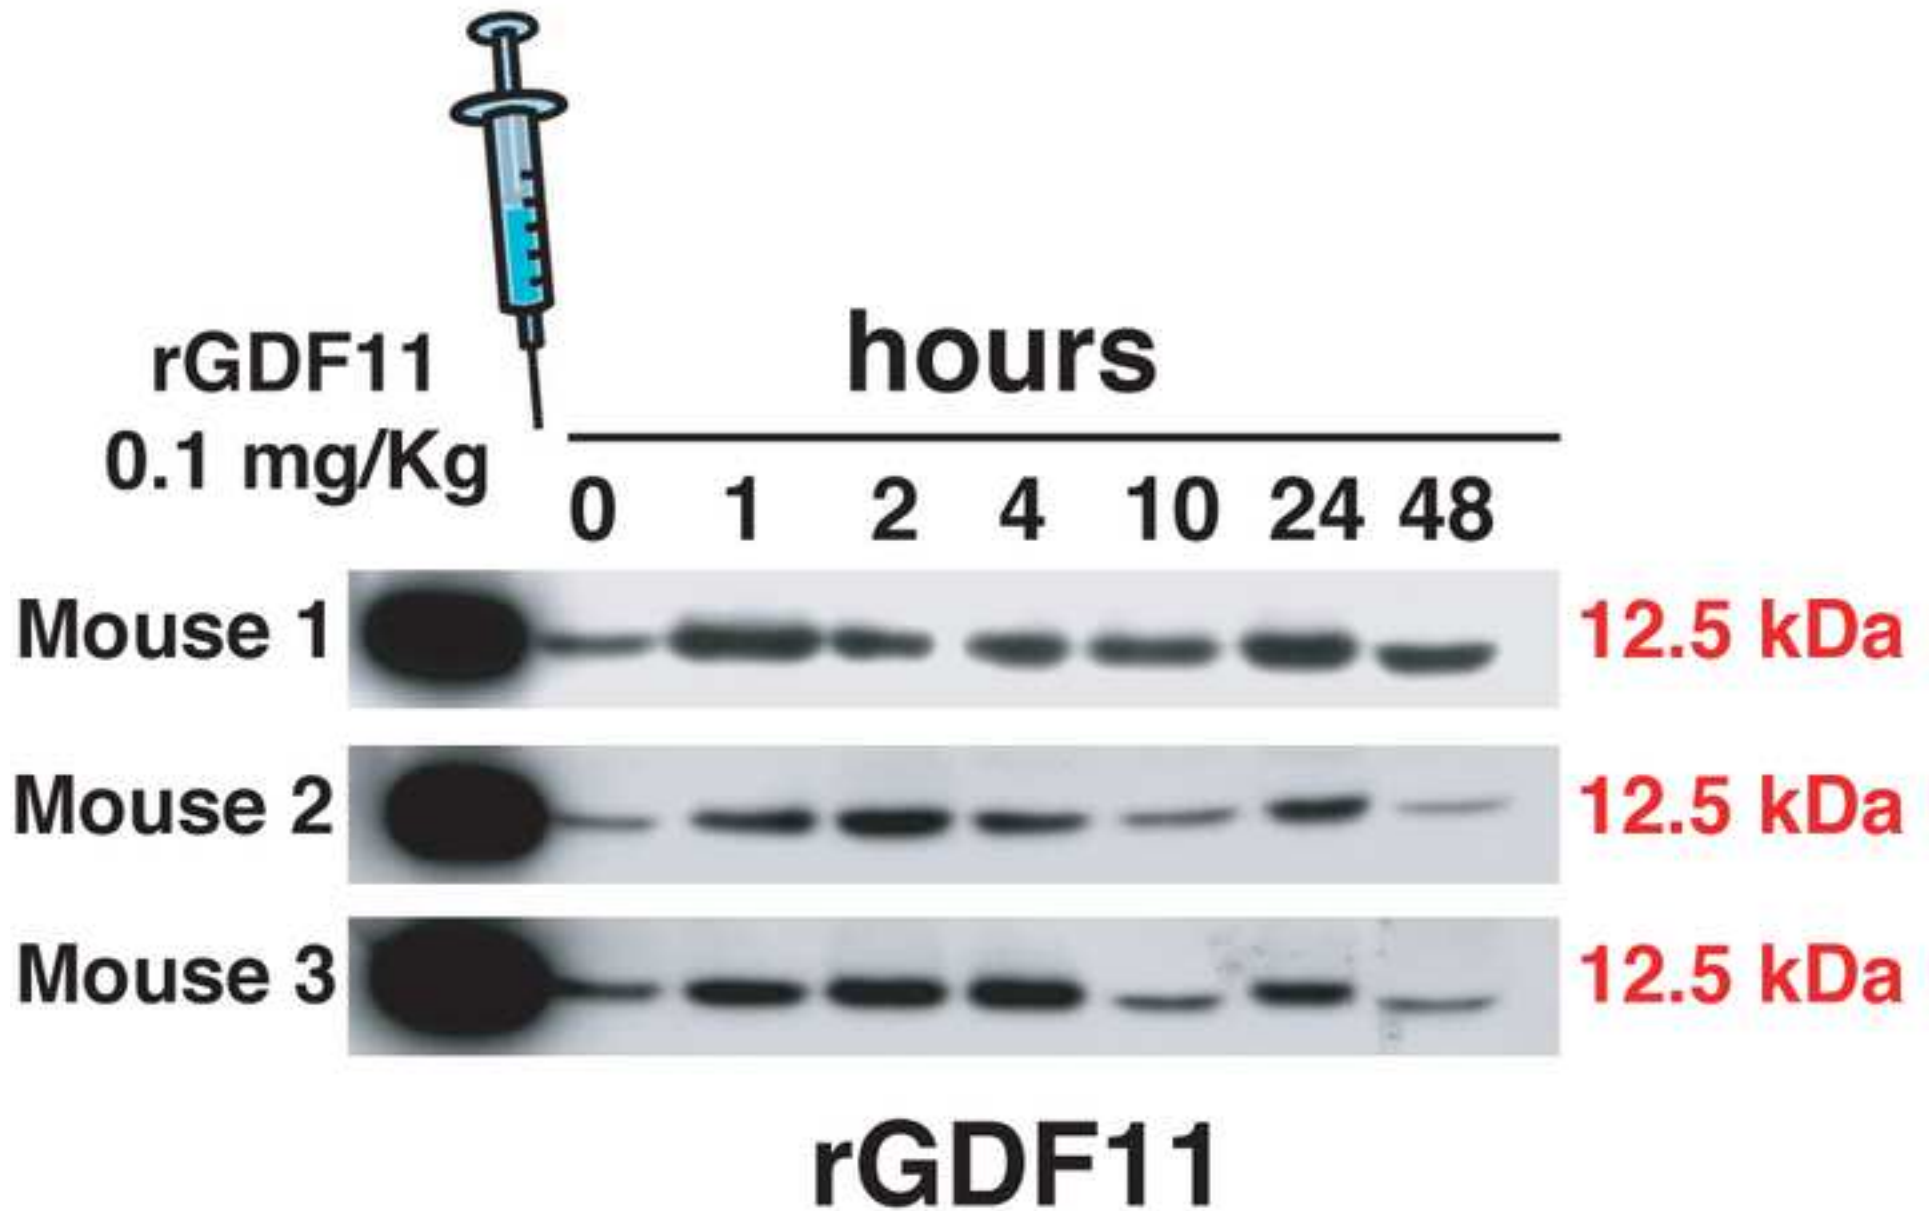



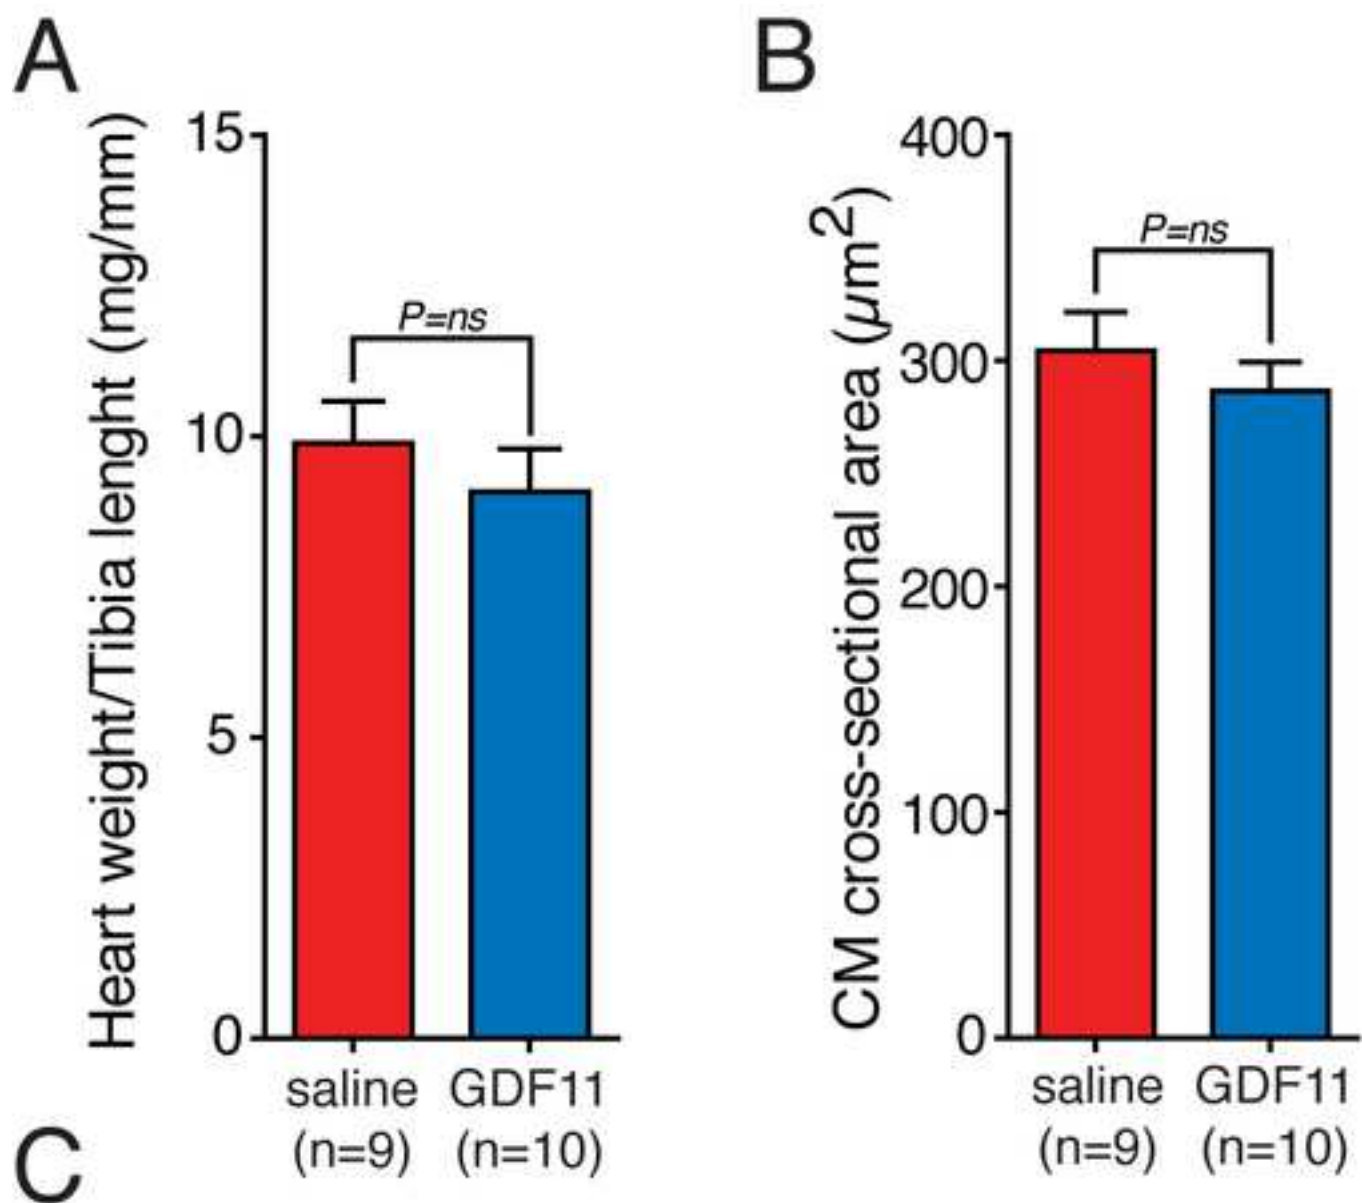

**C**

|          | Vehicle<br>(n=9) | GDF11<br>(n=10) |
|----------|------------------|-----------------|
| AWT (mm) | 1.43±0.03        | 1.34±0.05       |
| PWT (mm) | 1.11±0.03        | 1.05±0.03       |
| ESD (mm) | 1.37±0.17        | 1.53±0.27       |
| EDD (mm) | 2.75±0.12        | 2.86±0.2        |
| FS (%)   | 51.3±3.8         | 48.8±5.1        |

Supplement: NIHMS465691-supplement-02.pdf [file NIHMS465691-supplement-02.pdf]
